# Supplementary material
Source: PubMed Central journal article supplement (PMC3187178)

FIG S1. Map of the locations from which aerosol samples were collected over approximately a five week time span during summer and winter seasons, 2007. Symbols indicate the four cities surveyed in this study (  $\blacktriangle$  = Mayville,  $\blacksquare$  = Chicago, IL,  $\bullet$  = Detroit, MI, and  $\blacklozenge$  = Cleveland, OH). Inset is an expanded view of the Midwest region, U.S.A. Maps reprinted from Google Earth.

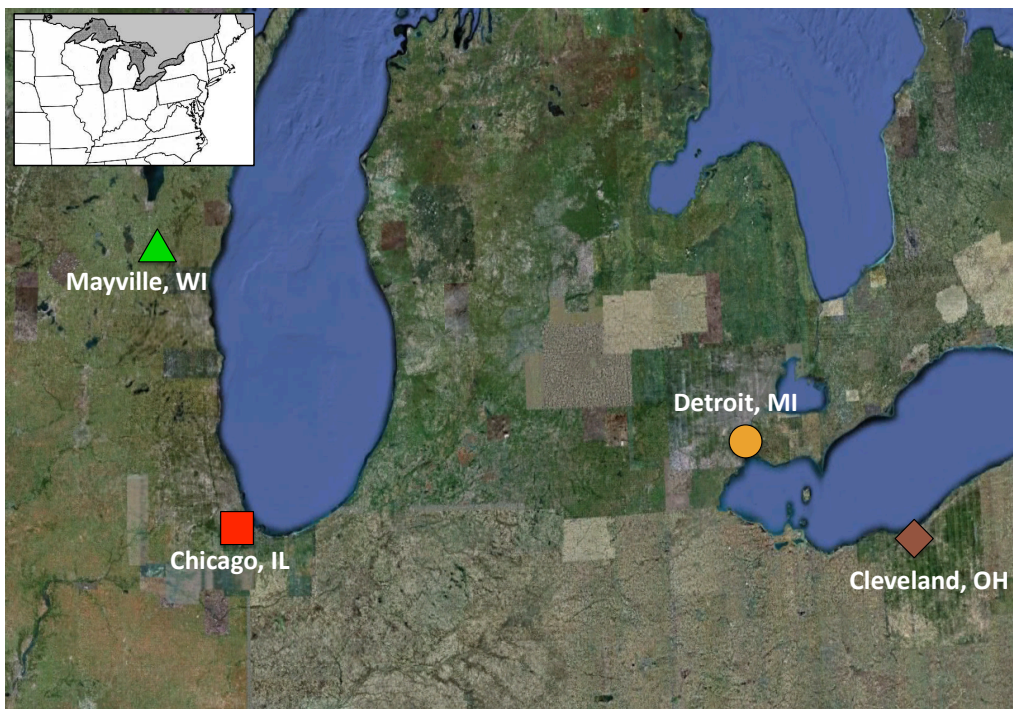

Supplement: supp_77_18_6350__1.pdf [file supp_77_18_6350__1.pdf]
